# Supplementary material for: Why clinicians overtest: development of a thematic framework
Source: PubMed Central journal article supplement (PMC7643462; doi:10.1186/s12913-020-05844-9), 2020-11-04
Supplement: 12913_2020_5844_MOESM1_ESM.pdf [file 12913_2020_5844_MOESM1_ESM.pdf]

## [Supplementary File 1] Search strategy

| <input type="checkbox"/> # ▲ Searches                                  | Results | Type     | Actions                                                |
|------------------------------------------------------------------------|---------|----------|--------------------------------------------------------|
| <input type="checkbox"/> 1 exp Medical Overuse/                        | 6305    | Advanced | <a href="#">Display Results</a> <a href="#">More ▼</a> |
| <input type="checkbox"/> 2 overdiagnos\$.mp.                           | 3755    | Advanced | <a href="#">Display Results</a> <a href="#">More ▼</a> |
| <input type="checkbox"/> 3 over diagnos\$.mp.                          | 1287    | Advanced | <a href="#">Display Results</a> <a href="#">More ▼</a> |
| <input type="checkbox"/> 4 overtest\$.mp.                              | 74      | Advanced | <a href="#">Display Results</a> <a href="#">More ▼</a> |
| <input type="checkbox"/> 5 over test\$.mp.                             | 353     | Advanced | <a href="#">Display Results</a> <a href="#">More ▼</a> |
| <input type="checkbox"/> 6 1 or 2 or 3 or 4 or 5                       | 11309   | Advanced | <a href="#">Display Results</a> <a href="#">More ▼</a> |
| <input type="checkbox"/> 7 exp Physicians/                             | 128157  | Advanced | <a href="#">Display Results</a> <a href="#">More ▼</a> |
| <input type="checkbox"/> 8 physician\$.mp.                             | 533965  | Advanced | <a href="#">Display Results</a> <a href="#">More ▼</a> |
| <input type="checkbox"/> 9 clinician\$.mp.                             | 207853  | Advanced | <a href="#">Display Results</a> <a href="#">More ▼</a> |
| <input type="checkbox"/> 10 doctor\$.mp.                               | 119116  | Advanced | <a href="#">Display Results</a> <a href="#">More ▼</a> |
| <input type="checkbox"/> 11 7 or 8 or 9 or 10                          | 808467  | Advanced | <a href="#">Display Results</a> <a href="#">More ▼</a> |
| <input type="checkbox"/> 12 exp Health Knowledge, Attitudes, Practice/ | 102425  | Advanced | <a href="#">Display Results</a> <a href="#">More ▼</a> |
| <input type="checkbox"/> 13 exp "Attitude of Health Personnel"/        | 150317  | Advanced | <a href="#">Display Results</a> <a href="#">More ▼</a> |
| <input type="checkbox"/> 14 attitude\$.mp.                             | 397625  | Advanced | <a href="#">Display Results</a> <a href="#">More ▼</a> |
| <input type="checkbox"/> 15 perce\$.mp.                                | 1225432 | Advanced | <a href="#">Display Results</a> <a href="#">More ▼</a> |
| <input type="checkbox"/> 16 view\$.mp.                                 | 440617  | Advanced | <a href="#">Display Results</a> <a href="#">More ▼</a> |
| <input type="checkbox"/> 17 understand\$.mp.                           | 1033085 | Advanced | <a href="#">Display Results</a> <a href="#">More ▼</a> |
| <input type="checkbox"/> 18 12 or 13 or 14 or 15 or 16 or 17           | 2812625 | Advanced | <a href="#">Display Results</a> <a href="#">More ▼</a> |
| <input type="checkbox"/> 19 6 and 11 and 18                            | 542     | Advanced | <a href="#">Display Results</a> <a href="#">More ▼</a> |
