# Supplementary material for: Why clinicians overtest: development of a thematic framework
Source: PubMed Central journal article supplement (PMC7643462; doi:10.1186/s12913-020-05844-9), 2020-11-04
Supplement: 12913_2020_5844_MOESM3_ESM.pdf [file 12913_2020_5844_MOESM3_ESM.pdf]

**[Supplementary File 3] Demographic characteristics of 15 workshop participants at the Preventing Overdiagnosis Conference, Sydney, 2019.**

| <b>Gender</b> | <b>Age (years)</b> | <b>Profession</b>                     | <b>Duration in workforce (years)</b> | <b>Country</b> | <b>Setting</b> | <b>Healthcare Sector</b> |
|---------------|--------------------|---------------------------------------|--------------------------------------|----------------|----------------|--------------------------|
| F             | 30-39              | Medical doctor<br>Academic/researcher | 5-10                                 | Europe         | Metropolitan   | Public                   |
| F             | 50-59              | Medical student                       | <5                                   | Australia      | Metropolitan   | -                        |
| M             | 40-49              | Academic/researcher<br>Other          | >20                                  | Australia      | Metropolitan   | Private                  |
| F             | 60-69              | Academic/researcher                   | 10-15                                | Australia      | Rural          | -                        |
| F             | 30-39              | Medical doctor<br>Other               | 5-10                                 | Australia      | Both           | Both                     |
| M             | 30-39              | Academic/researcher                   | 5-10                                 | Australia      | Metropolitan   | -                        |
| F             | 60-69              | Medical doctor                        | >20                                  | Europe         | Metropolitan   | Public                   |
| F             | 50-59              | Other                                 | 15-20                                | Australia      | Both           | Public                   |
| F             | 60-69              | Academic/researcher                   | 5-10                                 | Australia      | Metropolitan   | -                        |
| M             | 60-69              | Medical doctor                        | >20                                  | Denmark        | Both           | Both                     |
| M             | 30-39              | Medical doctor                        | ≤5                                   | Denmark        | Metropolitan   | Public                   |
| M             | 50-59              | Medical doctor<br>(nephrology)        | ≥20                                  | Colombia       | Both           | Both                     |
| F             | 40-49              | Academic/researcher                   | 15-20                                | Canada         | Metropolitan   | Public                   |
| F             | 50-59              | Medical doctor (GP/family physician)  | ≥20                                  | Australia      | Metropolitan   | Private                  |
| F             | 60-69              | Medical doctor (GP/family physician)  | ≥20                                  | Australia      | Rural          | Both                     |

**F** = female ; **M** = male
